# Supplementary material
Source: Springer Nature journal article supplement (https://www.springermedizin.de/resource/supplementary/40478_2013_134_MOESM7_ESM.pdf/25658058)
Supplement: MOESM7 [file 25658058]

**Title:** The *Arctic APP* mutation leads to Alzheimer's disease pathology with highly variable topographic deposition of differentially truncated A $\beta$

**Journal:** Acta Neuropathologica Communications

**Authors:** Hannu Kalimo<sup>1</sup>, Maciej Lalowski, Nenad Bogdanovic, Ola Philipson, Thomas D. Bird, David Nochlin, Gerard D. Schellenberg, RoseMarie Brundin, Tommie Olofsson, Marc Baumann, Oliver Wirths, Thomas A. Bayer, Lars N.G. Nilsson, Hans Basun, Lars Lannfelt, Martin Ingelsson

**Corresponding author:** <sup>1</sup>Hannu Kalimo, Department of Pathology, University and University Hospital of Helsinki, Helsinki, Finland,

**E-mail:** hannu.kalimo@helsinki.fi

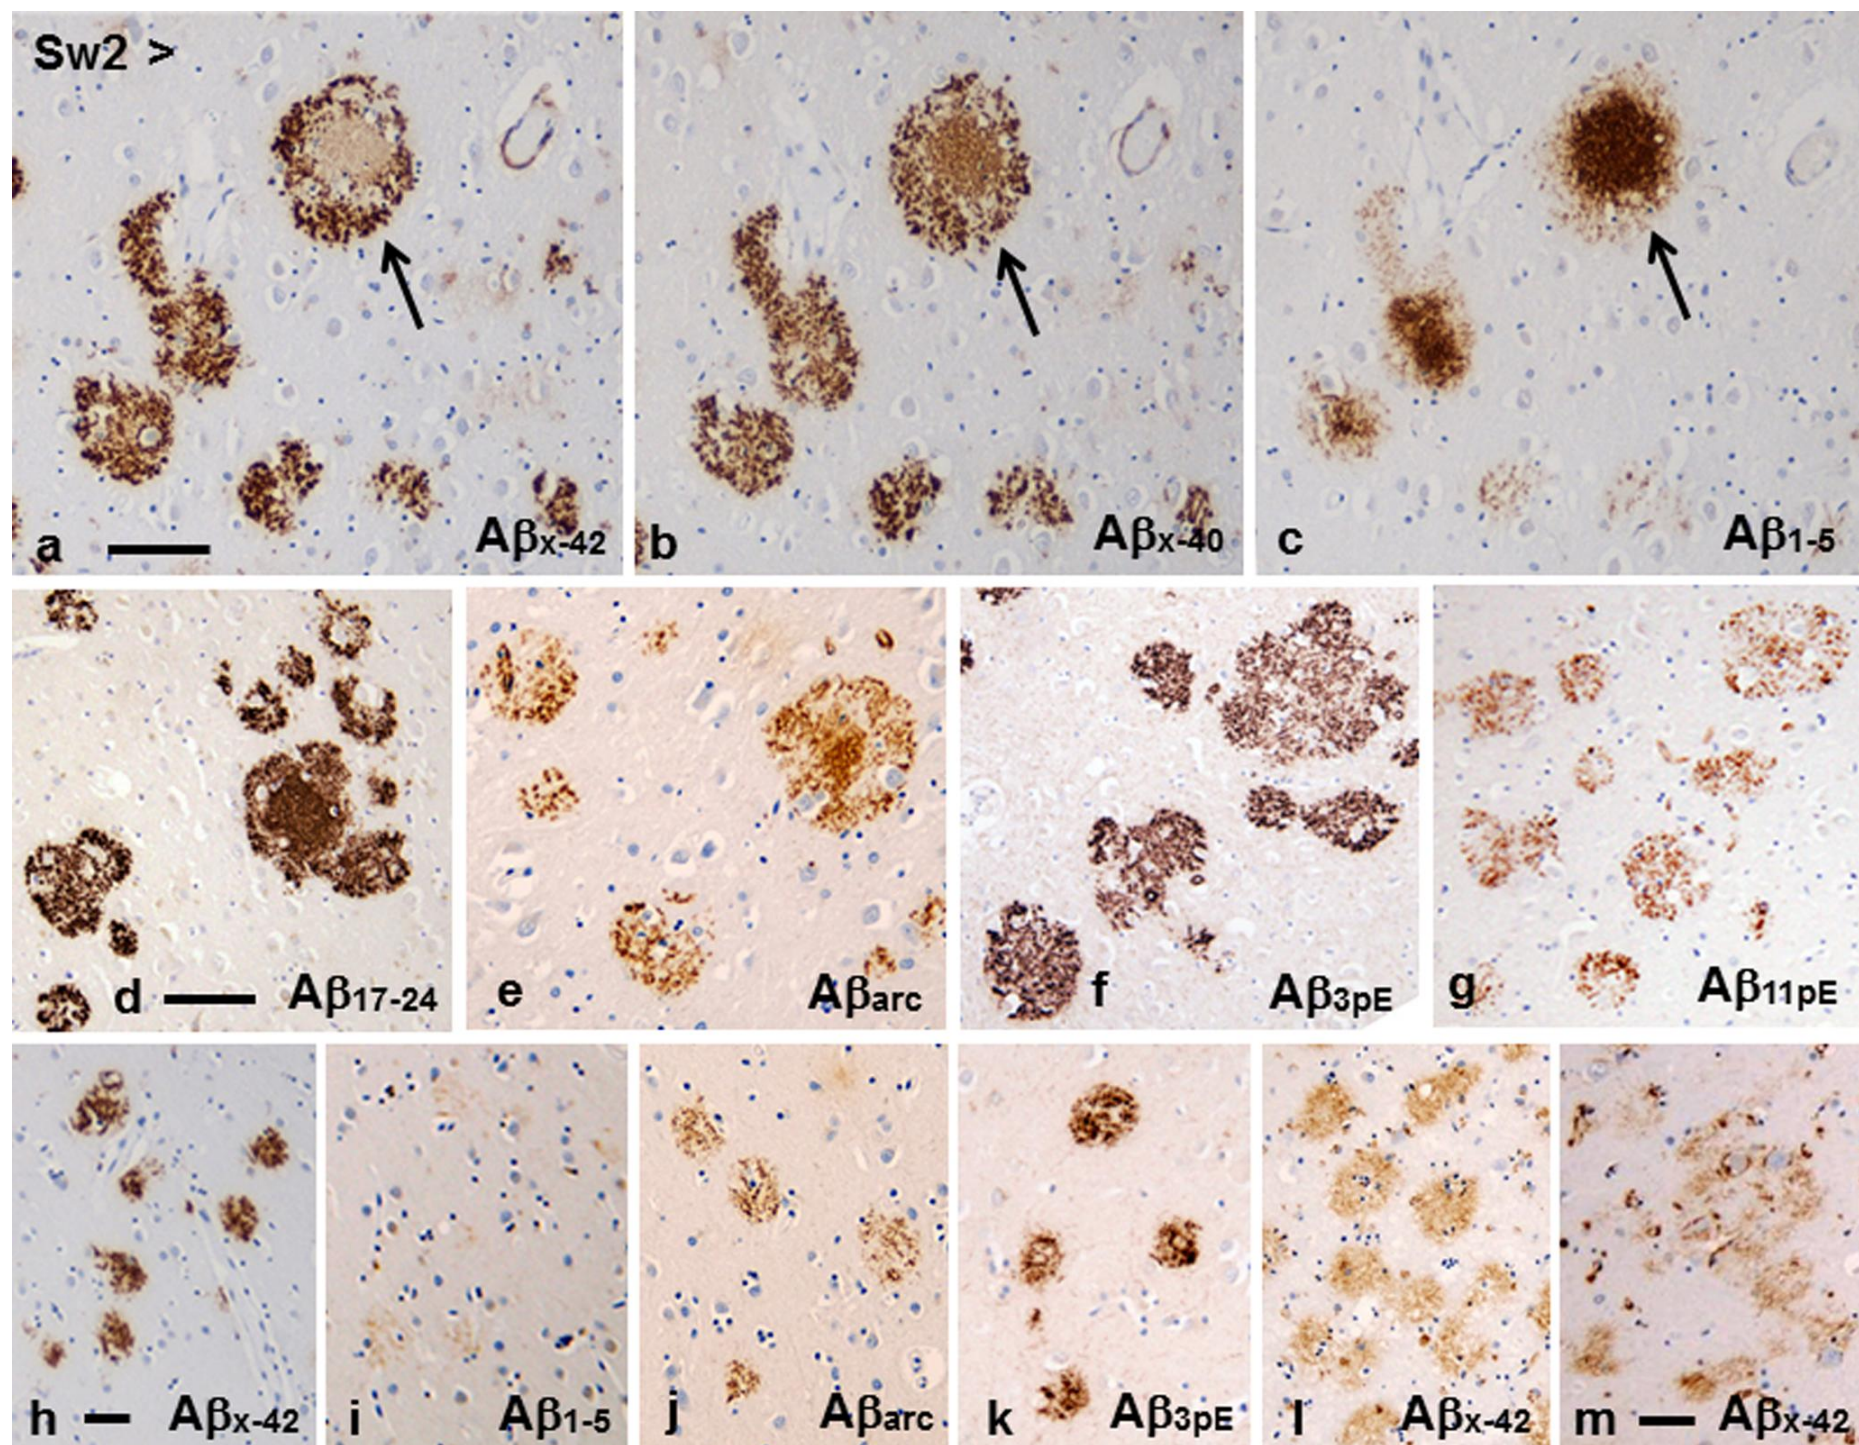

**Suppl. Fig. 4 a-g:** A $\beta$ -plaques in Swe2 patient's claustrum show similar targetoid pattern as in neocortex (**a-c** consecutive sections). **a:** With abA $\beta_{x-42}$  dark corona and pale centre. **b:** With abA $\beta_{x-40}$  fair staining of both centre and corona. **c:** With abA $\beta_{1-5}$  dark centre and pale corona. **d:** Mid-domain abA $\beta_{17-24}$  stains strongly both centre and corona. **e:** Specific abA $\beta_{arc}$  gives similar pattern as abA $\beta_{17-24}$ , though with much lesser intensity. **f** and **g:** Plaques comprise of both A $\beta_{3pE}$  and A $\beta_{11pE}$ , though less of the latter. **h-k:** Plaques in Sw2 patient's putamen are small and diffusely stained. The most intense stainings are seen with abA $\beta_{x-42}$ , abA $\beta_{arc}$  and abA $\beta_{3pE}$  (**h, j** and **k**) suggesting an abundance of A $\beta$  with pyroglutamate-modified N-termini, which is consistent with the virtually negative abA $\beta_{1-5}$  staining (**i**). **l:** In Sw2 patient's amygdala plaques are similar as in putamen but more numerous. **m:** In Sw2 patient's thalamus the plaques are ragged and weakly stained. (*bar in a* 100  $\mu$ m for **a-c**; *bar in d* 100  $\mu$ m for **d-g**; *bar in h* 50  $\mu$ m for **h-l**; *bar in m* 50  $\mu$ m)
